# Supplementary material for: Ultra-fine platinum species supported on niobium pentoxide for CO oxidation
Source: Royal Society of Chemistry journal article supplement (doi:10.1039/d0ra01252a), 2020-01-01
Supplement: d0ra01252a1.pdf [file d0ra01252a1.pdf]

## Ultra-fine Platinum Species Supported on Niobium Pentoxide for CO oxidation

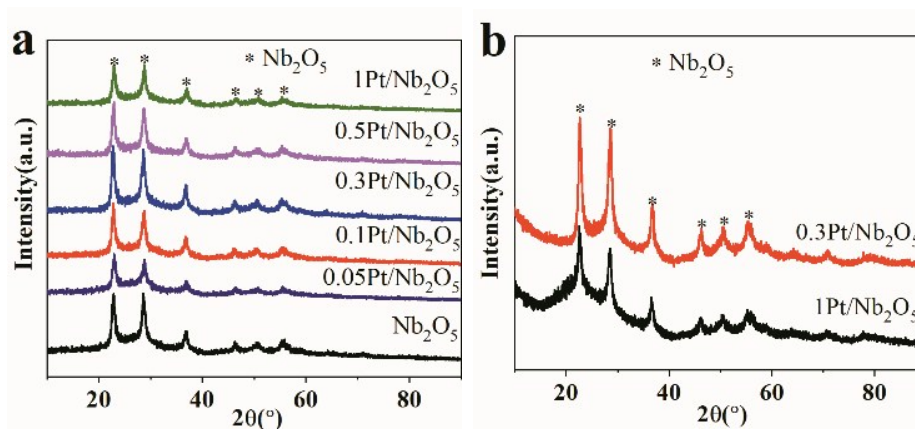

Figure S1 XRD patterns of Pt-Nb<sub>2</sub>O<sub>5</sub>: (a) fresh catalysts; (b) after H<sub>2</sub>-pretreatment.

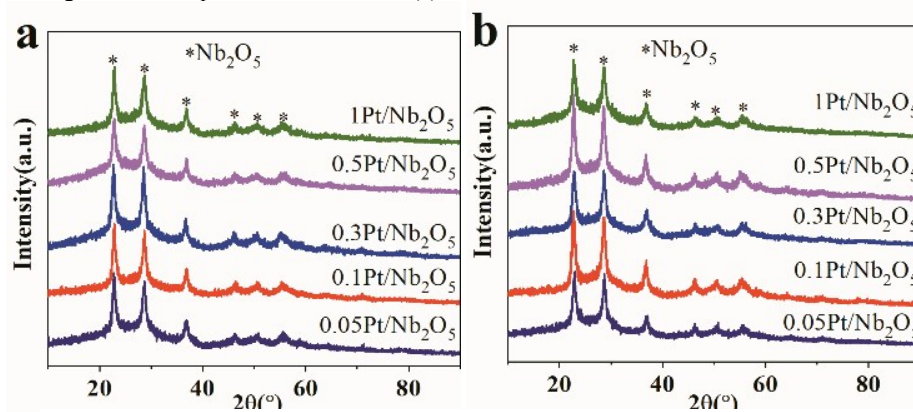

Figure S2 XRD patterns of Pt-Nb<sub>2</sub>O<sub>5</sub> for (a) used samples with H<sub>2</sub>-pretreatment; (b) used samples with O<sub>2</sub>-pretreatment

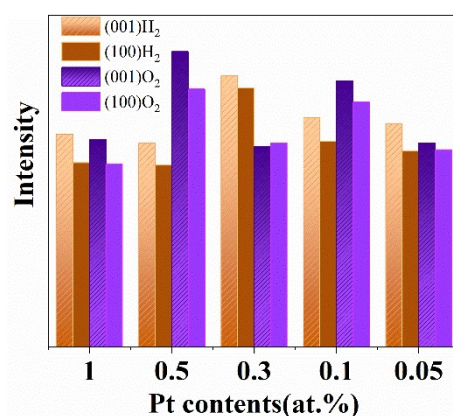

Figure S3. Intensity of (001) and (100) crystal planes of Nb<sub>2</sub>O<sub>5</sub> obtained from XRD patterns of used samples.

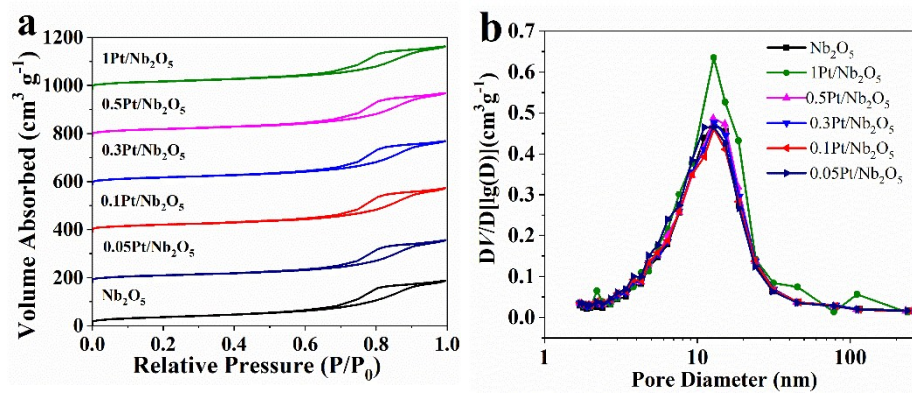

Figure S4 (a) N<sub>2</sub> adsorption-desorption isotherm and (b) BJH pore size distribution plots of Nb<sub>2</sub>O<sub>5</sub> and Pt/Nb<sub>2</sub>O<sub>5</sub>.

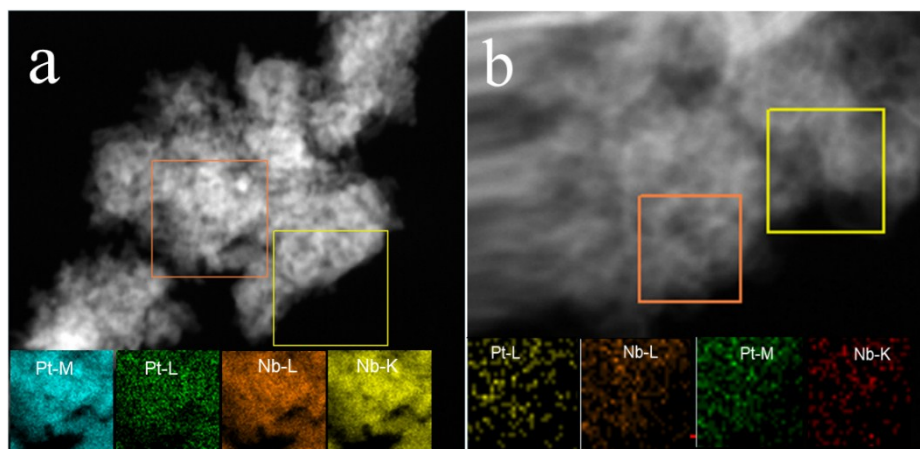

Figure S5 STEM-EDS mapping results of (a) 1Pt-Nb<sub>2</sub>O<sub>5</sub> fresh and (b) used 0.3 Pt-Nb<sub>2</sub>O<sub>5</sub> with H<sub>2</sub>-pretreatment. Inserts show the corresponding STEM-EDS elemental mapping images, and the red boxes in the STEM images indicate the data collection areas.
